# Supplementary material
Source: MDPI journal article supplement (https://www.mdpi.com/2225-1154/9/11/154)
Supplement: s1 [file s1]

Supplementary Information

# Harnessing Chlorophyll Fluorescence for Phenotyping Analysis of Wild and Cultivated Tomato for High Photochemical Efficiency under Water Deficit for Climate Change Resilience

Ilektra Sperdouli <sup>1</sup> , Ifigeneia Mellidou <sup>1</sup> , and Michael Moustakas <sup>2\*</sup> 

<sup>1</sup> Institute of Plant Breeding and Genetic Resources, Hellenic Agricultural Organization-Demeter (ELGO-Dimitra), Thessaloniki, GR-57001 Thessaloniki, Greece; ilektras@bio.auth.gr; ifimellidou@gmail.com

<sup>2</sup> Department of Botany, Aristotle University of Thessaloniki, GR-54124 Thessaloniki, Greece; moustak@bio.auth.gr

\* Correspondence: moustak@bio.auth.gr

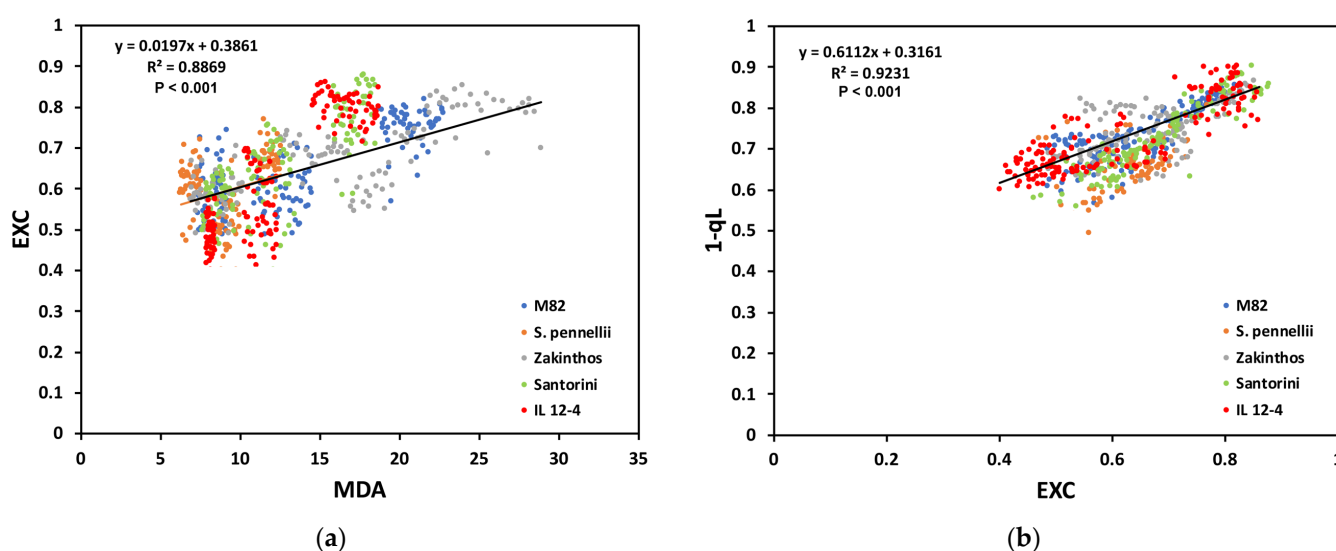

**Figure S1.** The relationship between the excess excitation energy at PSII (EXC) and the level of lipid peroxidation, measured as  $\mu\text{mol MDA g}^{-1}$  fresh weight (a), and between the excess excitation energy (EXC) and the parameter  $1 - q_L$ , where  $q_L$  is the redox state of  $Q_A$  based on the lake model (b), in *Solanum pennellii*, the introgression line IL12-4, and *Solanum lycopersicum* cv. M82, cv. Zakinthos, and cv. Santorini, under well-watered (control), moderate drought stress (MoDS) and severe drought stress (SDS).
